# Supplementary material for: mTOR inhibition suppresses Myc-driven polyposis by inducing immunogenic cell death
Source: PubMed Central journal article supplement (PMC10256613; doi:10.1038/s41388-023-02706-6), 2023-05-03

Figure S1

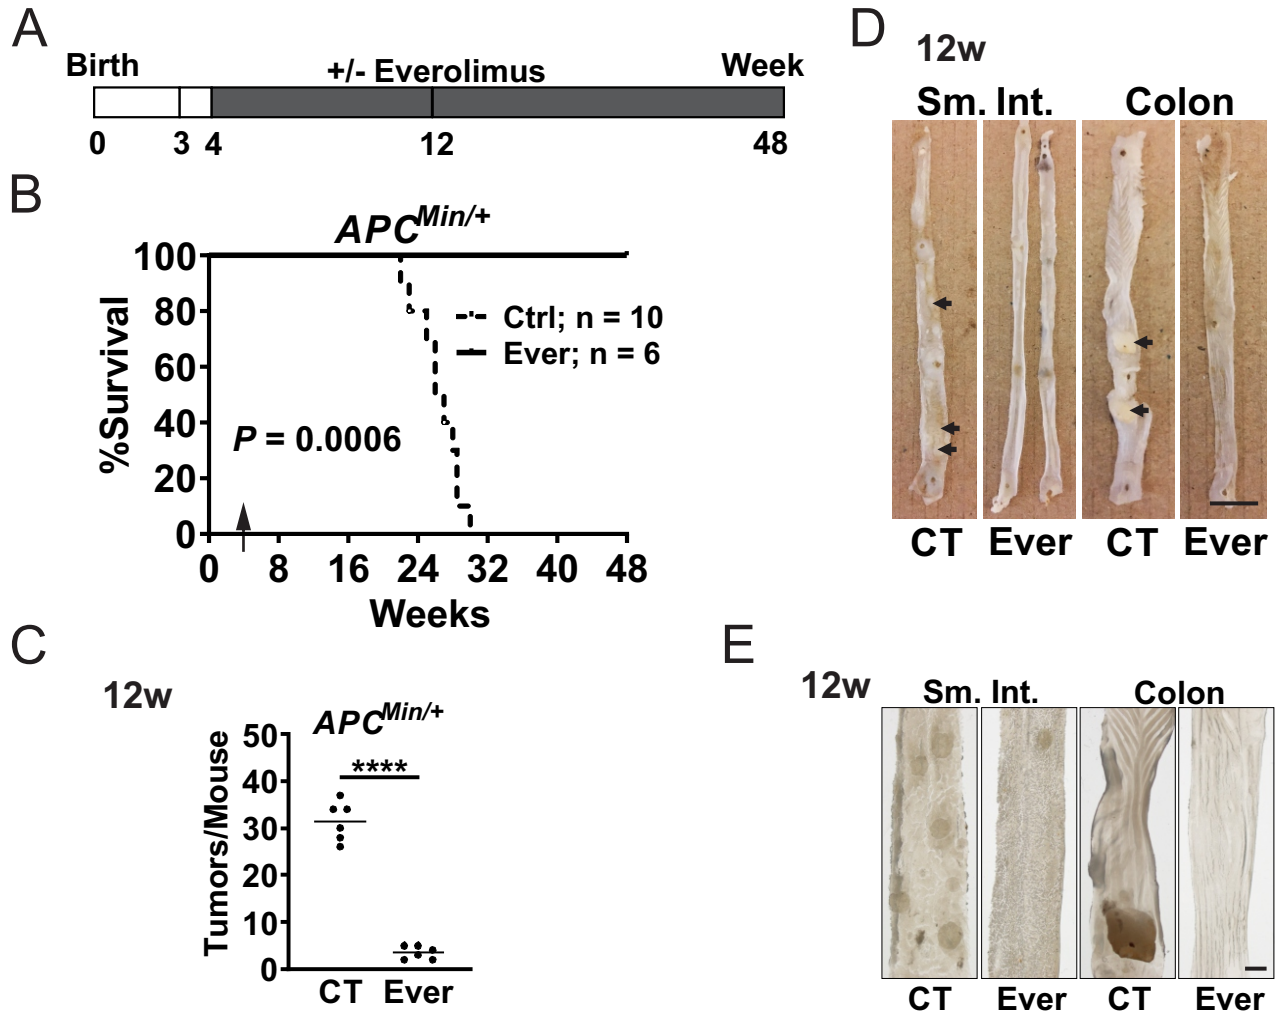

Figure S2

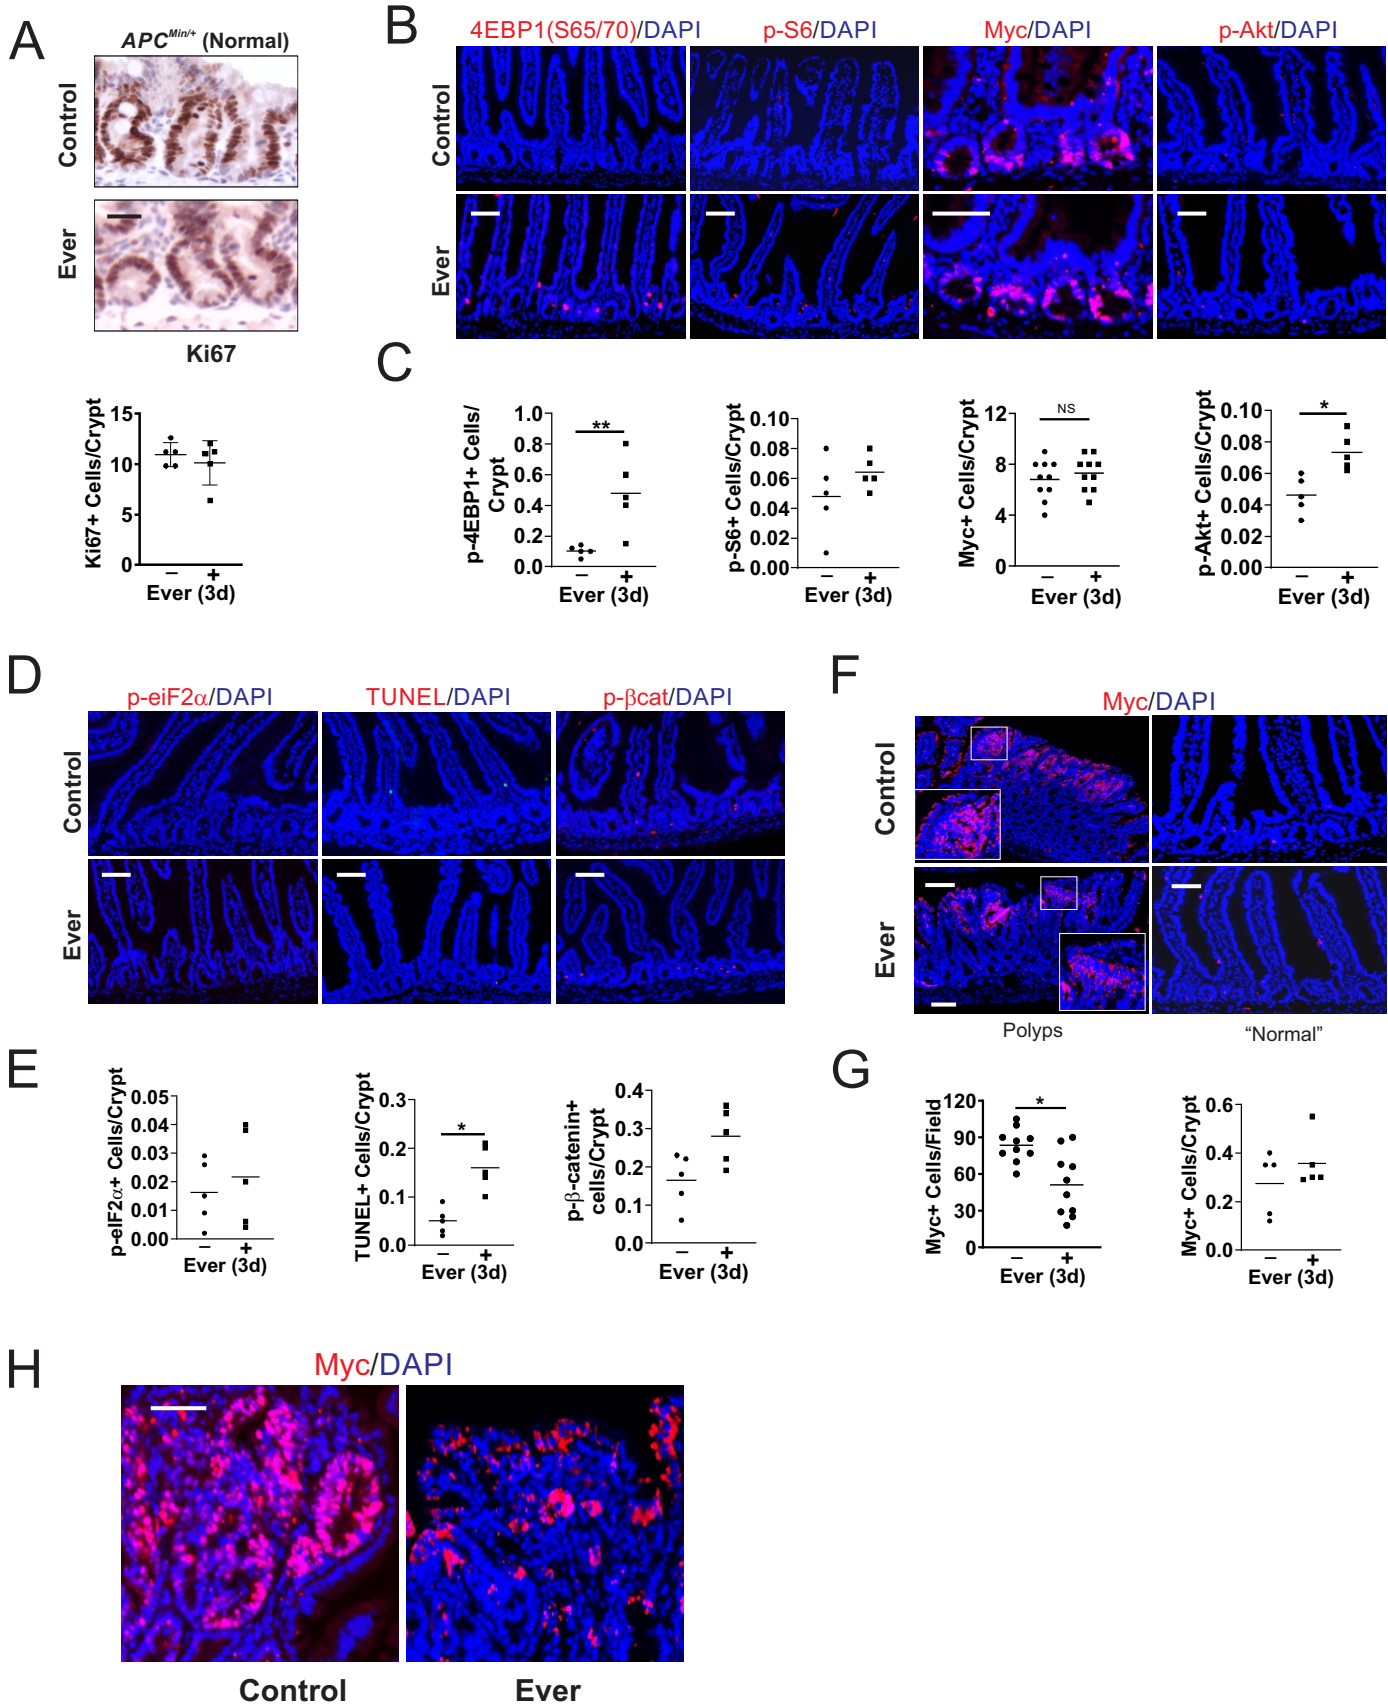

Figure S3

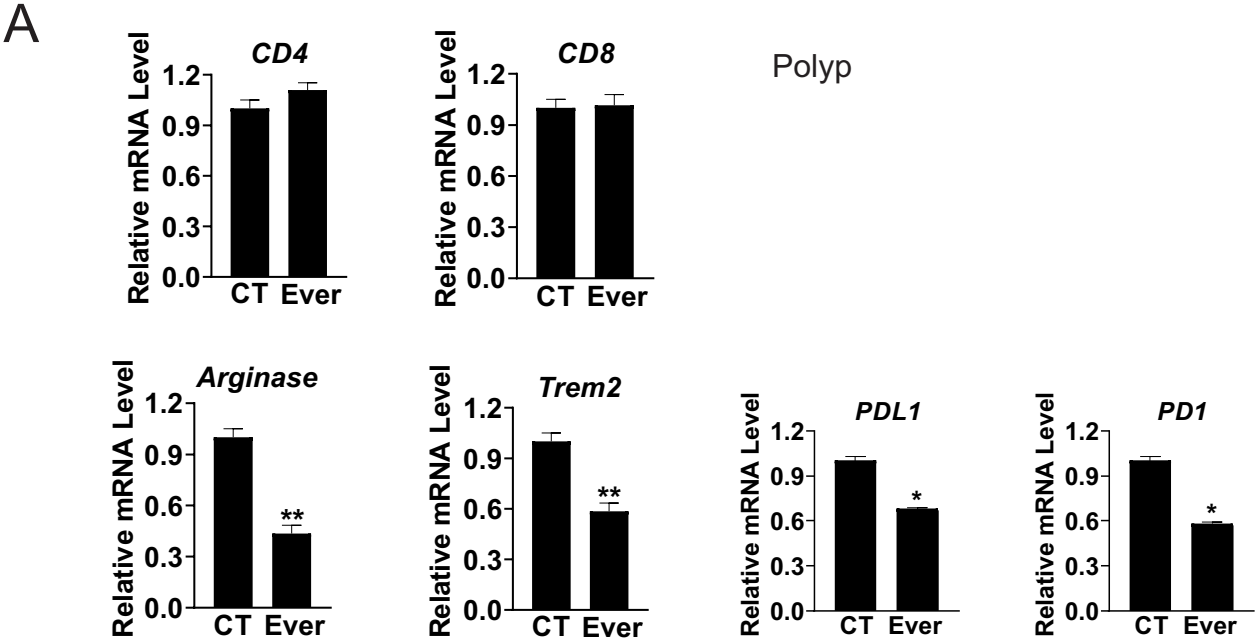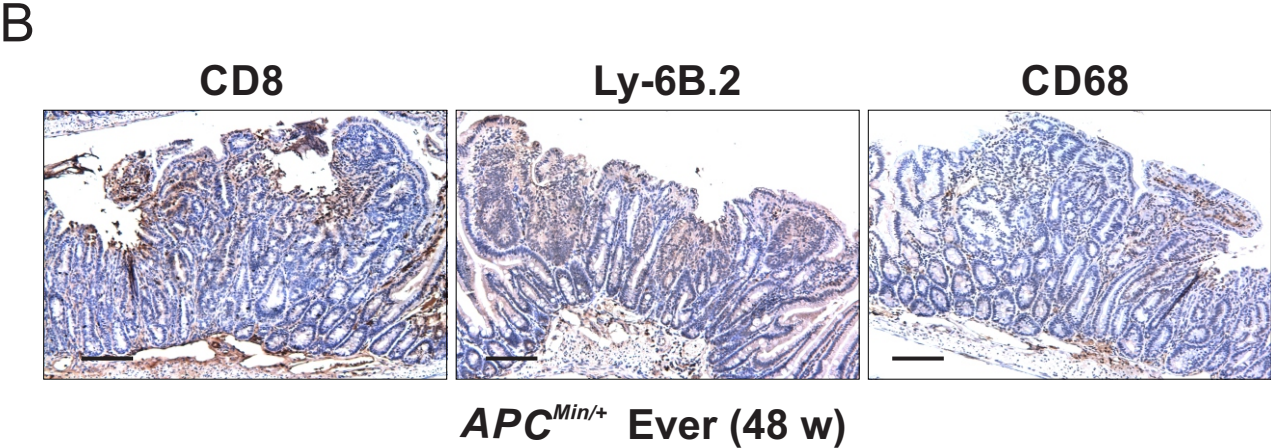

Figure S4

A

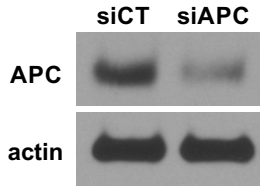

B

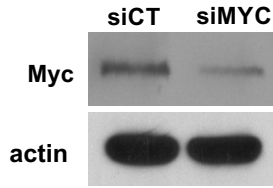

C

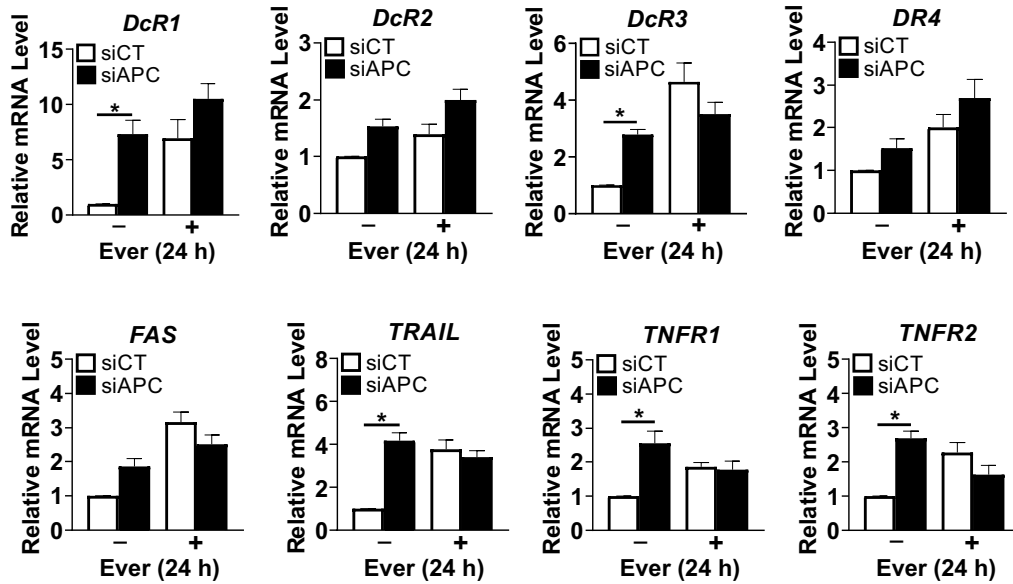

D

| 4D      | Un   | Ever | un   | Ever |
|---------|------|------|------|------|
| p-4EBP1 | 0.99 | 0.21 | 0.95 | 0.30 |
| p-S6    | 0.73 | 0.15 | 0.75 | 0.17 |
| p-AKT   | 0.11 | 0.90 | 0.22 | 0.43 |
| p-eIF4E | 0.39 | 0.36 | 0.61 | 0.70 |
| Myc     | 0.11 | 0.11 | 0.18 | 0.24 |
| p-eIF2a | 0.09 | 0.44 | 0.24 | 0.38 |

| 4E       | Un   | Ever | Un   | Ever | Un      | Ever    |
|----------|------|------|------|------|---------|---------|
| SiRNA    | CT   | CT   | APC  | APC  | APC/MYC | APC/MYC |
| Cas8_p18 | 0.17 | 0.28 | 0.35 | 0.96 | 0.23    | 0.37    |
| tBid     | 0.17 | 0.13 | 0.37 | 0.59 | 0.26    | 0.15    |
| *Cas3    | 0.18 | 0.17 | 0.35 | 0.74 | 0.11    | 0.14    |

| 4H       | Un   | Ever | un   | Ever | Un      | Ever    |
|----------|------|------|------|------|---------|---------|
| SiRNA    | CT   | CT   | APC  | APC  | APC/BID | APC/BID |
| Cas8_p18 | 0.03 | 0.04 | 0.14 | 0.48 | 0.07    | 0.16    |
| tBid     | 0.03 | 0.04 | 0.08 | 0.67 | 0.03    | 0.01    |
| *Cas3    | 0.03 | 0.04 | 0.12 | 0.52 | 0.05    | 0.14    |

| S4A,B/4H      |      |      |      |      |      |      |
|---------------|------|------|------|------|------|------|
| siRNA         | CT   | APC  | CT   | MYC  | CT   | BID  |
| Ratio (actin) | 0.90 | 0.35 | 0.51 | 0.17 | 3.35 | 0.66 |
| % vs CT       | 100% | 39%  | 100% | 34%  | 100% | 20%  |
| KD (%)        | N/A  | 61%  | N/A  | 66%  | N/A  | 80%  |

Figure S5

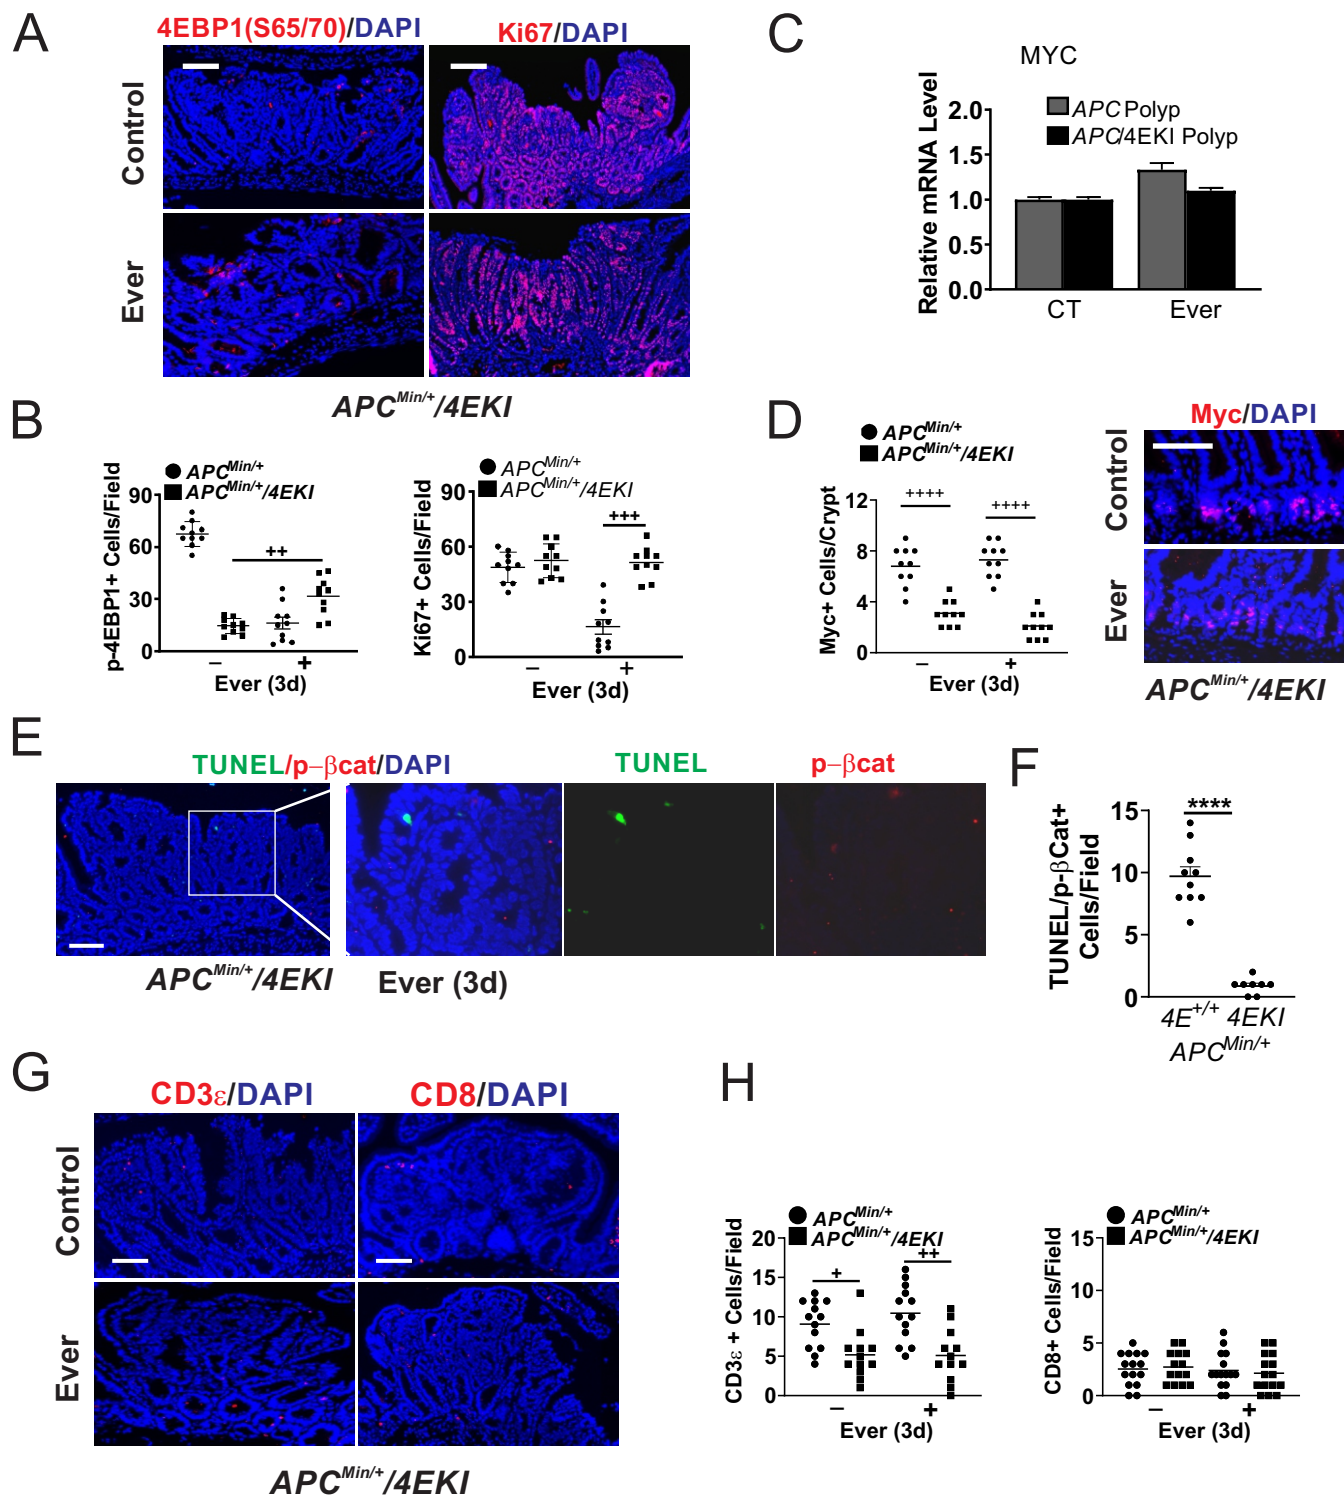

Figure S6

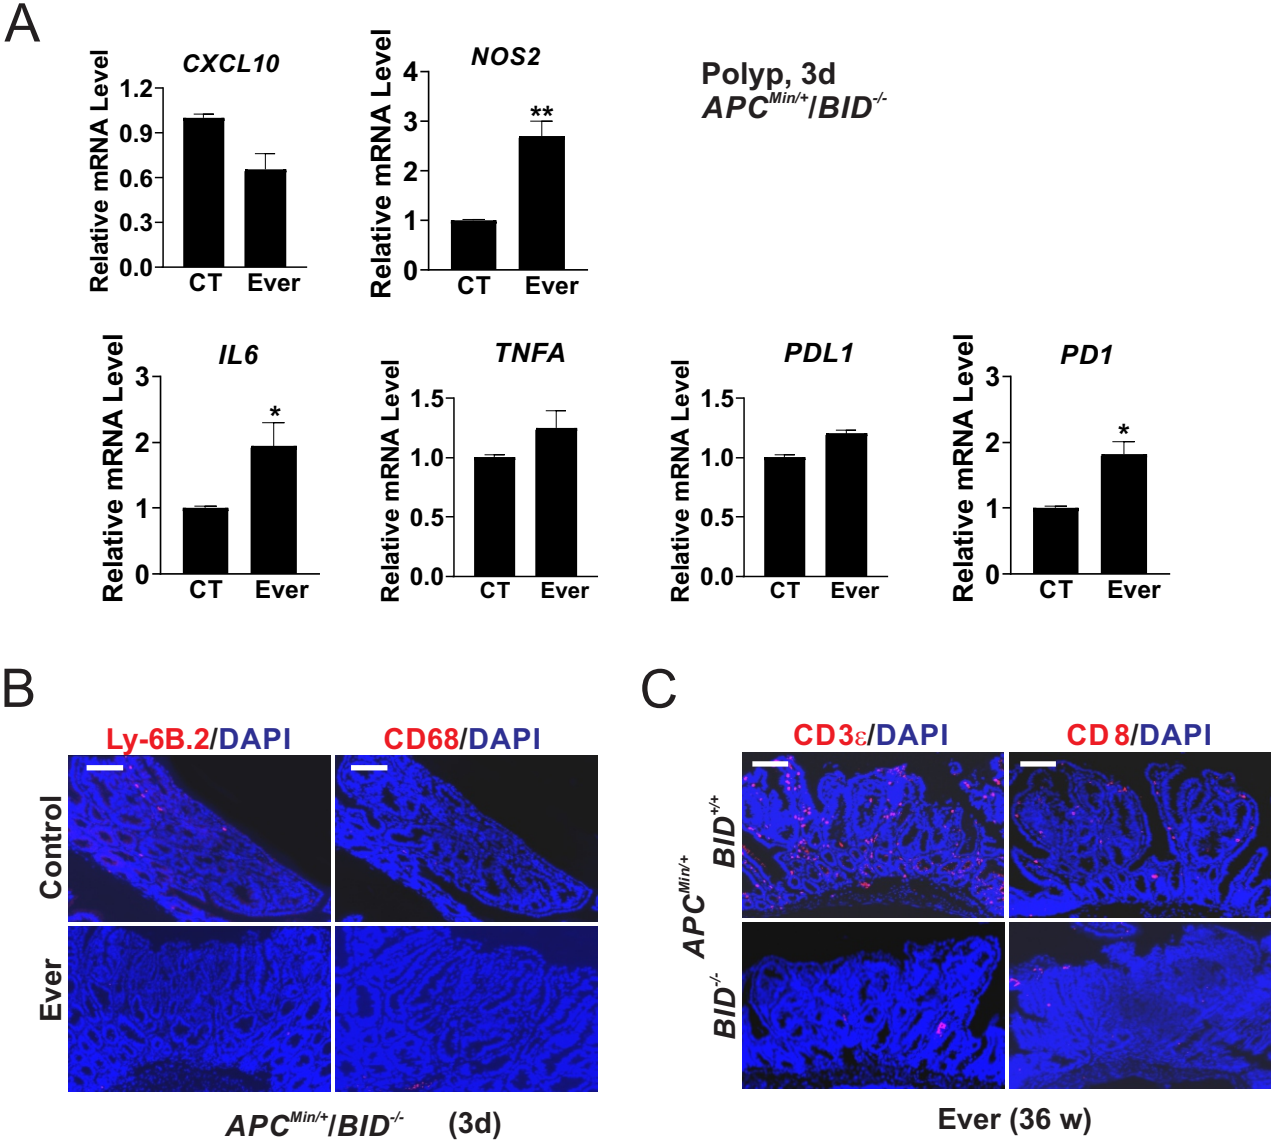

Supplement: 41388_2023_2706_MOESM2_ESM.pdf [file 41388_2023_2706_MOESM2_ESM.pdf]
